# Supplementary material for: Total Synthesis of Tetrodotoxin and 9-epiTetrodotoxin
Source: Research Square preprint supplement (doi:10.21203/rs.3.rs-2459518/v1), 2023-01-24

---

The following ALERTS were generated. Each ALERT has the format

**test-name\_ALERT\_alert-type\_alert-level.**

Click on the hyperlinks for more details of the test.

---

● **Alert level C**

|                   |                                                                  |       |        |
|-------------------|------------------------------------------------------------------|-------|--------|
| PLAT089_ALERT_3_C | Poor Data / Parameter Ratio (Zmax < 18) .....                    | 7.01  | Note   |
| PLAT338_ALERT_4_C | Small Aver Tau in Cyclohexane C4 -C11                            | 34.12 | Degree |
| PLAT338_ALERT_4_C | Small Aver Tau in Cyclohexane C31 -C44                           | 34.75 | Degree |
| PLAT340_ALERT_3_C | Low Bond Precision on C-C Bonds .....                            | 0.007 | Ang.   |
| PLAT790_ALERT_4_C | Centre of Gravity not Within Unit Cell: Resd. #<br>C26 H33 N3 O8 | 1     | Note   |
| PLAT911_ALERT_3_C | Missing FCF Refl Between Thmin & STh/L= 0.600                    | 9     | Report |
| PLAT992_ALERT_5_C | Repd & Actual _reflns_number_gt Values Differ by                 | 15    | Check  |

---

● **Alert level G**

|                   |                                                  |       |        |
|-------------------|--------------------------------------------------|-------|--------|
| PLAT398_ALERT_2_G | Deviating C-O-C Angle From 120 for O1 .          | 105.0 | Degree |
| PLAT398_ALERT_2_G | Deviating C-O-C Angle From 120 for O2 .          | 108.8 | Degree |
| PLAT398_ALERT_2_G | Deviating C-O-C Angle From 120 for O3 .          | 109.4 | Degree |
| PLAT398_ALERT_2_G | Deviating C-O-C Angle From 120 for O4 .          | 105.9 | Degree |
| PLAT398_ALERT_2_G | Deviating C-O-C Angle From 120 for O6 .          | 106.8 | Degree |
| PLAT398_ALERT_2_G | Deviating C-O-C Angle From 120 for O9 .          | 109.0 | Degree |
| PLAT398_ALERT_2_G | Deviating C-O-C Angle From 120 for O10 .         | 105.8 | Degree |
| PLAT398_ALERT_2_G | Deviating C-O-C Angle From 120 for O11 .         | 105.3 | Degree |
| PLAT398_ALERT_2_G | Deviating C-O-C Angle From 120 for O12 .         | 108.7 | Degree |
| PLAT398_ALERT_2_G | Deviating C-O-C Angle From 120 for O13 .         | 106.8 | Degree |
| PLAT791_ALERT_4_G | Model has Chirality at C4 (Sohnke SpGr)          | S     | Verify |
| PLAT791_ALERT_4_G | Model has Chirality at C5 (Sohnke SpGr)          | S     | Verify |
| PLAT791_ALERT_4_G | Model has Chirality at C6 (Sohnke SpGr)          | R     | Verify |
| PLAT791_ALERT_4_G | Model has Chirality at C11 (Sohnke SpGr)         | R     | Verify |
| PLAT791_ALERT_4_G | Model has Chirality at C12 (Sohnke SpGr)         | R     | Verify |
| PLAT791_ALERT_4_G | Model has Chirality at C13 (Sohnke SpGr)         | R     | Verify |
| PLAT791_ALERT_4_G | Model has Chirality at C14 (Sohnke SpGr)         | R     | Verify |
| PLAT791_ALERT_4_G | Model has Chirality at C17 (Sohnke SpGr)         | S     | Verify |
| PLAT791_ALERT_4_G | Model has Chirality at C31 (Sohnke SpGr)         | R     | Verify |
| PLAT791_ALERT_4_G | Model has Chirality at C32 (Sohnke SpGr)         | S     | Verify |
| PLAT791_ALERT_4_G | Model has Chirality at C33 (Sohnke SpGr)         | S     | Verify |
| PLAT791_ALERT_4_G | Model has Chirality at C37 (Sohnke SpGr)         | R     | Verify |
| PLAT791_ALERT_4_G | Model has Chirality at C38 (Sohnke SpGr)         | R     | Verify |
| PLAT791_ALERT_4_G | Model has Chirality at C41 (Sohnke SpGr)         | S     | Verify |
| PLAT791_ALERT_4_G | Model has Chirality at C43 (Sohnke SpGr)         | R     | Verify |
| PLAT791_ALERT_4_G | Model has Chirality at C44 (Sohnke SpGr)         | R     | Verify |
| PLAT870_ALERT_4_G | ALERTS Related to Twinning Effects Suppressed .. | !     | Info   |
| PLAT912_ALERT_4_G | Missing # of FCF Reflections Above STh/L= 0.600  | 12    | Note   |
| PLAT913_ALERT_3_G | Missing # of Very Strong Reflections in FCF .... | 1     | Note   |
| PLAT916_ALERT_2_G | Hooft y and Flack x Parameter Values Differ by . | 0.18  | Check  |

---

0 **ALERT level A** = Most likely a serious problem - resolve or explain

0 **ALERT level B** = A potentially serious problem, consider carefully

7 **ALERT level C** = Check. Ensure it is not caused by an omission or oversight

30 **ALERT level G** = General information/check it is not something unexpected

0 ALERT type 1 CIF construction/syntax error, inconsistent or missing data

11 ALERT type 2 Indicator that the structure model may be wrong or deficient  
4 ALERT type 3 Indicator that the structure quality may be low  
21 ALERT type 4 Improvement, methodology, query or suggestion  
1 ALERT type 5 Informative message, check

---

---

It is advisable to attempt to resolve as many as possible of the alerts in all categories. Often the minor alerts point to easily fixed oversights, errors and omissions in your CIF or refinement strategy, so attention to these fine details can be worthwhile. In order to resolve some of the more serious problems it may be necessary to carry out additional measurements or structure refinements. However, the purpose of your study may justify the reported deviations and the more serious of these should normally be commented upon in the discussion or experimental section of a paper or in the "special\_details" fields of the CIF. checkCIF was carefully designed to identify outliers and unusual parameters, but every test has its limitations and alerts that are not important in a particular case may appear. Conversely, the absence of alerts does not guarantee there are no aspects of the results needing attention. It is up to the individual to critically assess their own results and, if necessary, seek expert advice.

#### **Publication of your CIF in IUCr journals**

A basic structural check has been run on your CIF. These basic checks will be run on all CIFs submitted for publication in IUCr journals (*Acta Crystallographica*, *Journal of Applied Crystallography*, *Journal of Synchrotron Radiation*); however, if you intend to submit to *Acta Crystallographica Section C* or *E* or *IUCrData*, you should make sure that full publication checks are run on the final version of your CIF prior to submission.

#### **Publication of your CIF in other journals**

Please refer to the *Notes for Authors* of the relevant journal for any special instructions relating to CIF submission.

---

**PLATON version of 18/05/2022; check.def file version of 17/05/2022**

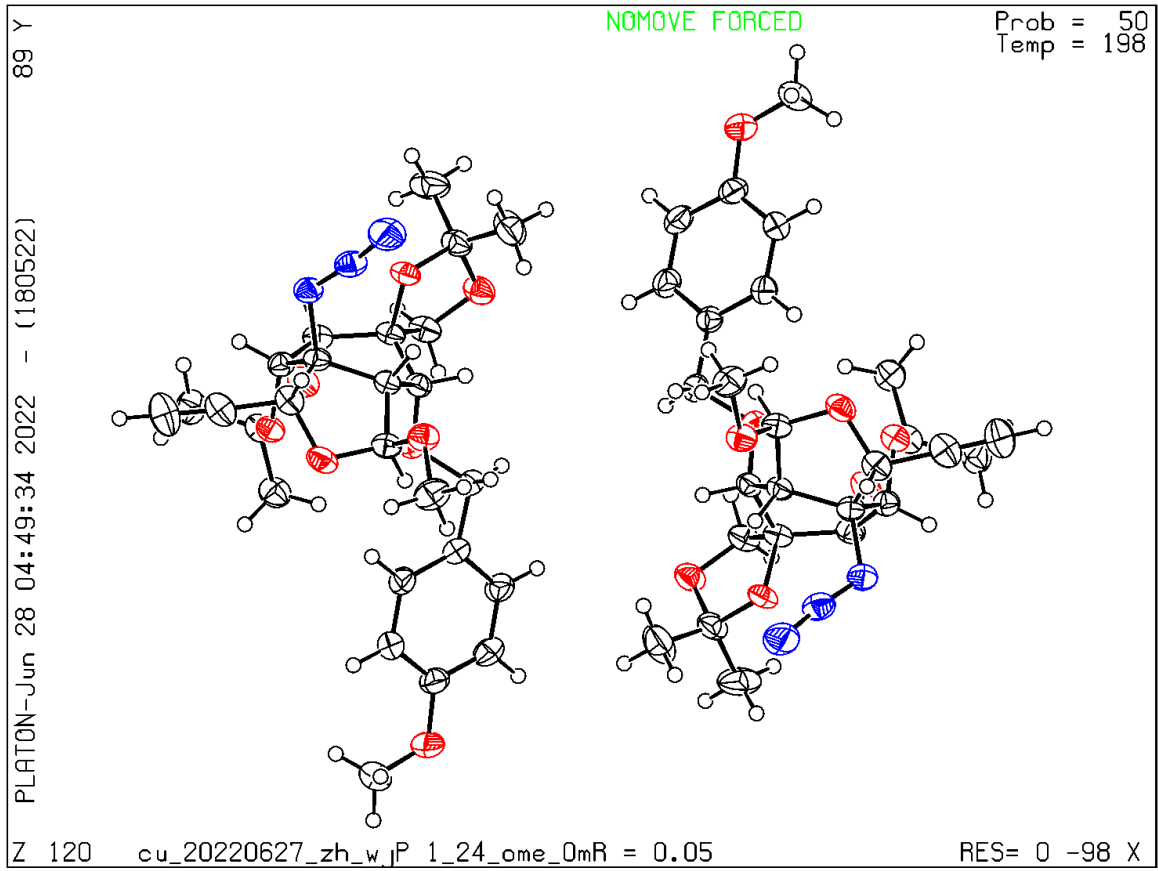

Supplement: Supplementary file 3 [file c53f5d99dd992c79b6febf7e.pdf]
